# Supplementary material
Source: publisher site journal article supplement (https://www.dovepress.com/article/345758)
Supplement: Supplementary file 1 [file get_supplementary_file.php]

**Supplementary table 1. Different inheritance model analysis of ten SNPs in microRNA-195, microRNA-126, microRNA-144, microRNA-155, microRNA-93, and microRNA-222 between NDM group and T2DM group**

|  | SNPs | Models | Genotypes | NDM(freq) | T2DM(freq) | OR (95% CI) | P value | AIC | BIC |
| --- | --- | --- | --- | --- | --- | --- | --- | --- | --- |
| miR-195 | rs78312845 | Codominant | A/A | 1276 (0.770) | 1183 (0.743) | 1.00 | 0.180 | 4508.8 | 4539.2 |
|  | A/G | 355 (0.214) | 382 (0.240) | 1.16 (0.98-1.37) |  |  |  |
|  | G/G | 25 (0.015) | 28 (0.018) | 1.21 (0.70-2.09) |  |  |  |
| Dominant | A/A | 1276 (0.770) | 1183 (0.743) | 1.00 | 0.065 | 4506.8 | 4531.2 |
|  | A/G-G/G | 380 (0.229) | 410 (0.257) | 1.16 (0.99-1.37) |  |  |  |
| Recessive | A/A-A/G | 1631 (0.985) | 1565 (0.982) | 1.00 | 0.570 | 4509.9 | 4534.2 |
|  | G/G | 25 (0.015) | 28 (0.018) | 1.17 (0.68-2.01) |  |  |  |
| Overdominant | A/A-G/G | 1301 (0.786) | 1211 (0.760) | 1.00 | 0.086 | 4507.3 | 4531.6 |
|  | A/G | 355 (0.214) | 382 (0.240) | 1.15 (0.98-1.36) |  |  |  |
| Log-additive | --- | --- | --- | 1.14 (0.99-1.32) | 0.069 | 4506.9 | 4531.3 |
| miR-126 | rs2297537 | Codominant | C/C | 1065 (0.645) | 1063 (0.667) | 1.00 | 0.290 | 4502.9 | 4533.3 |
|  | C/G | 522 (0.316) | 463 (0.291) | 0.89 (0.77-1.04) |  |  |  |
|  | G/G | 64 (0.039) | 67 (0.042) | 1.05 (0.74-1.49) |  |  |  |
| Dominant | C/C | 1065 (0.645) | 1063 (0.667) | 1.00 | 0.190 | 4501.7 | 4526.0 |
|  | C/G-G/G | 586 (0.355) | 530 (0.333) | 0.91 (0.78-1.05) |  |  |  |
| Recessive | C/C-C/G | 1587 (0.961) | 1526 (0.958) | 1.00 | 0.640 | 4503.2 | 4527.5 |
|  | G/G | 64 (0.039) | 67 (0.042) | 1.09 (0.77-1.54) |  |  |  |
| Overdominant | C/C-G/G | 1129 (0.684) | 1130 (0.709) | 1.00 | 0.120 | 4501.0 | 4525.3 |
|  | C/G | 522 (0.316) | 463 (0.291) | 0.89 (0.76-1.03) |  |  |  |
| Log-additive | --- | --- | --- | 0.94 (0.83-1.07) | 0.340 | 4502.5 | 4526.8 |
| miR-126 | rs2297538 | Codominant | G/G | 1257 (0.760) | 1197 (0.751) | 1.00 | 0.780 | 4510.4 | 4540.8 |
|  | A/G | 361 (0.218) | 363 (0.228) | 1.06 (0.89-1.25) |  |  |  |
|  | A/A | 37 (0.022) | 33 (0.021) | 0.94 (0.58-1.51) |  |  |  |
| Dominant | G/G | 1257 (0.760) | 1197 (0.751) | 1.00 | 0.590 | 4508.6 | 4532.9 |
|  | A/G-A/A | 398 (0.241) | 396 (0.249) | 1.04 (0.89-1.23) |  |  |  |
| Recessive | G/G-A/G | 1618 (0.978) | 1560 (0.970) | 1.00 | 0.750 | 4508.8 | 4533.1 |
|  | A/A | 37 (0.022) | 33 (0.021) | 0.93 (0.58-1.49) |  |  |  |
| Overdominant | G/G-A/A | 1294 (0.782) | 1230 (0.772) | 1.00 | 0.510 | 4508.4 | 4532.8 |
|  | A/G | 361 (0.218) | 363 (0.228) | 1.06 (0.90-1.25) |  |  |  |
| Log-additive | --- | --- | --- | 1.03 (0.89-1.18) | 0.710 | 4508.7 | 4533.1 |
| miR-144 | rs28448745 | Codominant | C/C | 788 (0.476) | 723 (0.454) | 1.00 | 0.370 | 4510.2 | 4540.7 |
|  | A/C | 695 (0.420) | 707 (0.444) | 1.11 (0.96-1.28) |  |  |  |
|  | A/A | 173 (0.104) | 163 (0.102) | 1.03 (0.81-1.30) |  |  |  |
| Dominant | C/C | 788 (0.476) | 723 (0.454) | 1.00 | 0.210 | 4508.6 | 4533.0 |
|  | A/C-A/A | 868 (0.524) | 870 (0.546) | 1.09 (0.95-1.25) |  |  |  |
| Recessive | C/C-A/C | 1483 (0.895) | 1430 (0.898) | 1.00 | 0.840 | 4510.2 | 4534.5 |
|  | A/A | 173 (0.104) | 163 (0.102) | 0.98 (0.78-1.22) |  |  |  |
| Overdominant | C/C-A/A | 961 (0.580) | 886 (0.556) | 1.00 | 0.170 | 4508.3 | 4532.6 |
|  | A/C | 695 (0.420) | 707 (0.444) | 1.10 (0.96-1.27) |  |  |  |
| Log-additive | --- | --- | --- | 1.05 (0.94-1.16) | 0.390 | 4509.5 | 4533.8 |
| miR-155 | rs1547354 | Codominant | G/G | 1238 (0.748) | 1191 (0.748) | 1.00 | 0.440 | 4509.2 | 4539.6 |
|  | A/G | 386 (0.233) | 362 (0.227) | 0.97 (0.83-1.15) |  |  |  |
|  | A/A | 31 (0.019) | 40 (0.025) | 1.34 (0.83-2.16) |  |  |  |
| Dominant | G/G | 1238 (0.748) | 1191 (0.748) | 1.00 | 0.990 | 4508.8 | 4533.2 |
|  | A/G-A/A | 417 (0.252) | 402 (0.252) | 1.00 (0.85-1.17) |  |  |  |
| Recessive | G/G-A/G | 1624 (0.981) | 1553 (0.975) | 1.00 | 0.210 | 4507.3 | 4531.6 |
|  | A/A | 31 (0.019) | 40 (0.025) | 1.35 (0.84-2.17) |  |  |  |
| Overdominant | G/G-A/A | 1269 (0.767) | 1231 (0.773) | 1.00 | 0.670 | 4508.6 | 4533.0 |
|  | A/G | 386 (0.233) | 362 (0.227) | 0.97 (0.82-1.14) |  |  |  |
| Log-additive | --- | --- | --- | 1.03 (0.89-1.18) | 0.710 | 4508.7 | 4533.0 |
| miR-93 | rs1527423 | Codominant | A/A | 1085 (0.655) | 1027 (0.645) | 1.00 | 0.530 | 4511.0 | 4541.4 |
|  | A/G | 507 (0.306) | 512 (0.321) | 1.07 (0.92-1.24) |  |  |  |
|  | G/G | 64 (0.039) | 54 (0.034) | 0.89 (0.61-1.29) |  |  |  |
| Dominant | A/A | 1085 (0.655) | 1027 (0.645) | 1.00 | 0.530 | 4509.8 | 4534.2 |
|  | A/G-G/G | 571 (0.345) | 566 (0.355) | 1.05 (0.91-1.21) |  |  |  |
| Recessive | A/A-A/G | 1592 (0.961) | 1539 (0.966) | 1.00 | 0.470 | 4509.7 | 4534.0 |
|  | G/G | 64 (0.039) | 54 (0.034) | 0.87 (0.60-1.26) |  |  |  |
| Overdominant | A/A-G/G | 1149 (0.694) | 1081 (0.679) | 1.00 | 0.350 | 4509.3 | 4533.7 |
|  | A/G | 507 (0.306) | 512 (0.321) | 1.07 (0.93-1.25) |  |  |  |
| Log-additive | --- | --- | --- | 1.02 (0.90-1.15) | 0.770 | 4510.1 | 4534.5 |
| miR-222 | rs2858061 | Codominant | G/G | 367 (0.604) | 389 (0.646) | 1.00 | 0.220 | 1681.5 | 1701.9 |
|  | C/G | 214 (0.352) | 184 (0.306) | 0.81 (0.63-1.03) |  |  |  |
|  | C/C | 27 (0.044) | 29 (0.048) | 1.01 (0.59-1.74) |  |  |  |
| Dominant | G/G | 367 (0.604) | 389 (0.646) | 1.00 | 0.120 | 1680.1 | 1695.4 |
|  | C/G-C/C | 241 (0.396) | 213 (0.354) | 0.83 (0.66-1.05) |  |  |  |
| Recessive | G/G-C/G | 581 (0.956) | 573 (0.952) | 1.00 | 0.760 | 1682.4 | 1697.7 |
|  | C/C | 27 (0.044) | 29 (0.048) | 1.09 (0.64-1.86) |  |  |  |
| Overdominant | G/G-C/C | 394 (0.648) | 418 (0.694) | 1.00 | 0.084 | 1679.5 | 1694.8 |
|  | C/G | 214 (0.352) | 184 (0.306) | 0.81 (0.64-1.03) |  |  |  |
| Log-additive | --- | --- | --- | 0.89 (0.73-1.08) | 0.240 | 1681.1 | 1696.4 |
| miR-222 | rs34678647 | Codominant | G/G | 400 (0.658) | 404 (0.671) | 1.00 | 0.870 | 1684.3 | 1704.7 |
|  | G/T | 178 (0.293) | 168 (0.279) | 0.93 (0.73-1.20) |  |  |  |
|  | T/T | 30 (0.049) | 30 (0.050) | 0.99 (0.59-1.68) |  |  |  |
| Dominant | G/G | 400 (0.658) | 404 (0.671) | 1.00 | 0.630 | 1682.3 | 1697.6 |
|  | G/T-T/T | 208 (0.342) | 198 (0.329) | 0.94 (0.74-1.20) |  |  |  |
| Recessive | G/G-G/T | 578 (0.951) | 572 (0.950) | 1.00 | 0.960 | 1682.5 | 1697.8 |
|  | T/T | 30 (0.049) | 30 (0.050) | 1.01 (0.60-1.71) |  |  |  |
| Overdominant | G/G-T/T | 430 (0.707) | 434 (0.721) | 1.00 | 0.590 | 1682.3 | 1697.6 |
|  | G/T | 178 (0.293) | 168 (0.279) | 0.93 (0.73-1.20) |  |  |  |
| Log-additive | --- | --- | --- | 0.96 (0.79-1.17) | 0.710 | 1682.4 | 1697.7 |
| miR-222 | rs2858060 | Codominant | C/C | 369 (0.607) | 388 (0.643) | 1.00 | 0.410 | 1684.1 | 1704.5 |
|  | C/G | 212 (0.349) | 190 (0.315) | 0.85 (0.67-1.08) |  |  |  |
|  | G/G | 27 (0.044) | 25 (0.042) | 0.88 (0.50-1.54) |  |  |  |
| Dominant | C/C | 369 (0.607) | 388 (0.643) | 1.00 | 0.180 | 1682.1 | 1697.4 |
|  | C/G-G/G | 239 (0.393) | 215 (0.357) | 0.85 (0.68-1.08) |  |  |  |
| Recessive | C/C-C/G | 581 (0.956) | 578 (0.958) | 1.00 | 0.790 | 1683.9 | 1699.2 |
|  | G/G | 27 (0.044) | 25 (0.042) | 0.93 (0.53-1.62) |  |  |  |
| Overdominant | C/C-G/G | 396 (0.651) | 413 (0.685) | 1.00 | 0.210 | 1682.3 | 1697.6 |
|  | C/G | 212 (0.349) | 190 (0.315) | 0.86 (0.67-1.09) |  |  |  |
| Log-additive | --- | --- | --- | 0.88 (0.73-1.08) | 0.220 | 1682.4 | 1697.7 |
| miR-222 | rs2745709 | Codominant | C/C | 220 (0.362) | 232 (0.385) | 1.00 | 0.630 | 1685.0 | 1705.4 |
|  | C/T | 296 (0.487) | 278 (0.461) | 0.89 (0.69-1.14) |  |  |  |
|  | T/T | 92 (0.151) | 93 (0.154) | 0.96 (0.68-1.35) |  |  |  |
| Dominant | C/C | 220 (0.362) | 232 (0.385) | 1.00 | 0.400 | 1683.2 | 1698.5 |
|  | C/T-T/T | 388 (0.638) | 371 (0.615) | 0.90 (0.72-1.14) |  |  |  |
| Recessive | C/C-C/T | 516 (0.849) | 510 (0.846) | 1.00 | 0.880 | 1683.9 | 1699.2 |
|  | T/T | 92 (0.151) | 93 (0.154) | 1.02 (0.75-1.40) |  |  |  |
| Overdominant | C/C-T/T | 312 (0.513) | 325 (0.539) | 1.00 | 0.350 | 1683.1 | 1698.4 |
|  | C/T | 296 (0.487) | 278 (0.461) | 0.90 (0.72-1.13) |  |  |  |
| Log-additive | --- | --- | --- | 0.96 (0.81-1.13) | 0.600 | 1683.7 | 1699.0 |

Note: Abbreviations: SNP: single nucleotide polymorphisms; T2DM: type 2 diabetes; NDM: nondiabetic; AIC, Akaike information criterion; BIC, Bayesian information criterion
